# Supplementary material for: Is the evidence on the effectiveness of pay for performance schemes in healthcare changing? Evidence from a meta-regression analysis
Source: PubMed Central journal article supplement (PMC7905606; doi:10.1186/s12913-021-06118-8), 2021-02-24
Supplement: 12913_2021_6118_MOESM2_ESM.pdf [file 12913_2021_6118_MOESM2_ESM.pdf]

## Appendix B: Tables from the pooled new studies and studies from [4]

Table B.1: Number of studies and schemes included in the review by country and setting

| Country     | Hospital | Multi-specialty or Primary care physician | Number of studies | Number and schemes |
|-------------|----------|-------------------------------------------|-------------------|--------------------|
| Afghanistan | 0        | 1                                         | 1                 | 1                  |
| Australia   | 1        | 2                                         | 3                 | 3                  |
| Canada      | 2        | 8                                         | 10                | 9                  |
| China       | 0        | 3                                         | 3                 | 2                  |
| France      | 0        | 4                                         | 4                 | 1                  |
| Italy       | 1        | 1                                         | 2                 | 2                  |
| Kenya       | 0        | 1                                         | 1                 | 1                  |
| Philippines | 1        | 0                                         | 1                 | 1                  |
| Rwanda      | 0        | 2                                         | 2                 | 1                  |
| Sweden      | 0        | 1                                         | 1                 | 1                  |
| Taiwan      | 8        | 11                                        | 19                | 4                  |
| Tanzania    | 1        | 2                                         | 3                 | 1                  |
| UK          | 5        | 13                                        | 18                | 5                  |
| US          | 16       | 32                                        | 48                | 50                 |
| Total       | 35       | 81                                        | 116               | 62                 |

Table B.2: Summary of overall effects

|                                        | <b>Mean</b>  | <b>Median</b>                    | <b>Min-Max</b>    |
|----------------------------------------|--------------|----------------------------------|-------------------|
| <u>A: By scheme (n=62)</u>             |              |                                  |                   |
| Number of significant effect sizes     | 14.72        | 5.00                             | 0-156             |
| Number of effect sizes                 | 30.54        | 10.00                            | 1-332             |
| Proportion of significant effect sizes | 0.57         |                                  |                   |
| <u>B: By study (n=116)</u>             |              |                                  |                   |
| Number of significant effect sizes     | 7.87         | 6.00                             | 0-68              |
| Number of effect sizes                 | 16.33        | 12.00                            | 1-120             |
| Proportion of significant effect sizes | 0.56         |                                  |                   |
|                                        | <b>Total</b> | <b>Statistically significant</b> | <b>Proportion</b> |
| <b>Reported effect sizes</b>           | 1,894        | 913                              | 0.48              |

Table B.3: Mean proportion of significant effect sizes by scheme

| <b>Scheme</b>                                     | <b>Proportion of significant effect sizes</b> | <b>Number of effect sizes</b> | <b>Number of studies</b> |
|---------------------------------------------------|-----------------------------------------------|-------------------------------|--------------------------|
| Advancing Quality                                 | 0.35                                          | 60                            | 3                        |
| Afghanistan P4P                                   | 0                                             | 7                             | 1                        |
| Alabama Managed Care Organization                 | 0.33                                          | 9                             | 1                        |
| Alternative Quality Contract                      | 0.47                                          | 332                           | 8                        |
| BSBC (Michigan) Physician Group Incentive Program | 0.78                                          | 22                            | 1                        |
| Best Practice Tariff                              | 0.49                                          | 41                            | 2                        |
| Breast Cancer P4P                                 | 1                                             | 3                             | 1                        |
| Bronx CHAMPION                                    | 0.60                                          | 5                             | 1                        |
| CAPI-ROSP                                         | 0.69                                          | 48                            | 4                        |
| Chronic disease P4P                               | 0.2                                           | 35                            | 1                        |
| Clinical directed enhanced services               | 0.83                                          | 6                             | 1                        |

|                                                           |      |     |   |
|-----------------------------------------------------------|------|-----|---|
| Community-based psychiatric care P4P                      | 1    | 6   | 1 |
| Diabetes Care Project                                     | 0.32 | 34  | 1 |
| ED P4P                                                    | 1    | 2   | 1 |
| Emilia-Romagna P4P                                        | 0.50 | 2   | 1 |
| Fairview Health Services                                  | 0.31 | 39  | 1 |
| Health Plan in Hawaii                                     | 1    | 4   | 1 |
| Highmark's Quality Blue (QB) in Pennsylvania              | 1    | 1   | 1 |
| Houston/Harris County Community Health Program            | 0.67 | 3   | 1 |
| Hudson Health Plan - diabetes                             | 0    | 12  | 1 |
| Hudson Health Plan - immunization                         | 1    | 2   | 1 |
| Improve hospital discharge follow-ups P4P                 | 0    | 5   | 1 |
| Kaiser Permanent Northern California                      | 1    | 2   | 1 |
| Lazio DRG P4P                                             | 1    | 4   | 1 |
| Medicaid                                                  | 0.18 | 28  | 1 |
| Medicaid Mass Health                                      | 0    | 2   | 1 |
| Medicare Advantage Prescription Drug Plan (MAPD)          | 0.29 | 17  | 1 |
| Medicare Dialysis payment Reform                          | 1    | 1   | 1 |
| Medicare Hospital Value-Based Purchasing (HVBP)           | 0    | 6   | 1 |
| Medicare Never Events                                     | 0.57 | 7   | 2 |
| Medicare Pioneer ACOs                                     | 0.50 | 109 | 3 |
| Medicare Premier Hospital Quality Incentive Demonstration | 0.10 | 49  | 5 |
| Mental health P4P                                         | 1    | 24  | 1 |
| Mental Health Integration Program (MHIP)                  | 1    | 1   | 1 |
| NHS stop smoking services                                 | 0.33 | 6   | 1 |
| Ningxia scheme                                            | 0.41 | 49  | 2 |
| Ontario P4P                                               | 0.5  | 8   | 2 |
| P4P for Antibiotics                                       | 0.5  | 6   | 1 |

|                                                |      |     |    |
|------------------------------------------------|------|-----|----|
| P4P for Diabetes                               | 0.74 | 163 | 15 |
| P4P for Hepatitis                              | 0.75 | 8   | 2  |
| P4P for Immunization                           | 0.36 | 28  | 1  |
| P4P for Malaria                                | 0.82 | 11  | 1  |
| P4P for Maternal care                          | 0.73 | 67  | 3  |
| P4P for Tuberculosis                           | 1    | 2   | 2  |
| P4P for drug prescription                      | 0.50 | 24  | 1  |
| Pacific Care /IHA                              | 0.28 | 54  | 1  |
| Partners Health Care, Inc.                     | 1    | 1   | 1  |
| Partners for Kids                              | 0.67 | 21  | 1  |
| Pay for results P4P                            | 0.60 | 63  | 1  |
| Physician Group Practice Demonstration         | 0.62 | 122 | 3  |
| Physician Integrated Network (PIN)             | 0.67 | 3   | 1  |
| Practice Incentives Program                    | 0.50 | 4   | 1  |
| Primary Care Information Project               | 0.60 | 20  | 2  |
| Quality and Outcomes Framework                 | 0.39 | 119 | 11 |
| Quality Improvement Demonstration Study (QIDS) | 0.50 | 4   | 1  |
| Queensland P4P                                 | 0.25 | 4   | 1  |
| RWF-AHRG Health Promotion                      | 1    | 1   | 1  |
| Rwanda P4P                                     | 0.20 | 115 | 2  |
| Spontaneous breathing (SBTs) P4P               | 0.50 | 18  | 1  |
| Veterans Affairs networks                      | 0.58 | 12  | 1  |
| eHeart (pilot)                                 | 0.38 | 21  | 1  |
| Low-Density Lipoprotein Cholesterol (LDL-C)    | 0.33 | 12  | 1  |

Table B.4: Mean proportion of significant effect sizes by country

| <b>Country</b> | <b>Portion of significant effect sizes</b> | <b>Number of effect sizes</b> | <b>Number of studies</b> | <b>Number of schemes</b> |
|----------------|--------------------------------------------|-------------------------------|--------------------------|--------------------------|
| Afghanistan    | 0                                          | 7                             | 1                        | 1                        |

|             |      |     |    |    |
|-------------|------|-----|----|----|
| Australia   | 0.33 | 42  | 3  | 3  |
| Canada      | 0.58 | 158 | 10 | 9  |
| China       | 0.59 | 143 | 12 | 6  |
| France      | 0.69 | 48  | 4  | 1  |
| Italy       | 0.83 | 6   | 2  | 2  |
| Kenya       | 0.82 | 11  | 1  | 1  |
| Philippines | 0.50 | 4   | 1  | 1  |
| Rwanda      | 0.20 | 115 | 2  | 1  |
| Sweden      | 0.50 | 6   | 1  | 1  |
| Taiwan      | 0.75 | 94  | 10 | 0  |
| Tanzania    | 0.73 | 67  | 3  | 1  |
| UK          | 0.40 | 232 | 18 | 5  |
| US          | 0.45 | 961 | 48 | 31 |

Table B.5: Relative size of incentive payments to revenue

| <b>Scheme, Study</b>                                                         | <b>Country</b> | <b>Payment/Revenue (%)</b> |
|------------------------------------------------------------------------------|----------------|----------------------------|
| P4P for Antibiotics, [16]                                                    | Sweden         | 0.05-1.2                   |
| Medicare Hospital Value-Based Purchasing, [44]                               | US             | 1-2                        |
| Medicare Premier Hospital Quality Incentive Demonstration, [45, 46]          | US             | 1-2                        |
| Medicare Dialysis Payment Reform, [47]                                       | US             | 2                          |
| Breast Cancer P4P, [48]                                                      | Taiwan         | 2-7                        |
| Health Plan in Hawaii, [49][50]                                              | US             | 3.5                        |
| Houston/Harris County Community Health Program, [51]                         | US             | 3-4                        |
| Partners Health Care, [52, 53]                                               | US             | 3-4.8                      |
| Ontario P4P, [54, 55]                                                        | Canada         | 3-10                       |
| Advancing Quality Initiative, [10, 11]                                       | UK             | 4                          |
| CAPI-ROSP, [56]                                                              | France         | 4-7                        |
| Bronx CHAMPION, [57, 58]                                                     | US             | 5                          |
| Primary Care Information Project, [59]                                       | US             | 5                          |
| Quality Improvement Demonstration Study, [60]                                | Philippines    | 5                          |
| Blue Cross Blue Shield of Michigan's Physician Group Incentive Program, [18] | US             | 5-10                       |
| Afghanistan P4P, [61]                                                        | Afghanistan    | 6-28                       |
| Contract for Improving Individual Practices, [8]                             | France         | 7                          |
| Spontaneous breathing trials (SBTs), [62–64]                                 | US             | 7.5                        |
| Alternative Quality Contract, [12–14]                                        | US             | 10                         |
| P4P for Maternal care, [65]                                                  | Tanzania       | 10-25                      |
| Rwanda P4P, [66]                                                             | Rwanda         | 14                         |
| Hudson Medicaid Health Plan, [67, 68]                                        | US             | 15-25                      |
| Best Practice Tariff, [69]                                                   | UK             | 24                         |
| Mental Health Integration Program, [17, 70–72]                               | US             | 25                         |
| Quality and Outcomes Framework, [73]                                         | UK             | 25                         |
| Shandong scheme, [74, 75]                                                    | China          | Up to 20%                  |
| Ningxia scheme, [2]                                                          | China          | Up to 30%                  |
